# Supplementary material for: Metagenomes and metatranscriptomes shed new light on the microbial-mediated sulfur cycle in a Siberian soda lake
Source: PubMed Central journal article supplement (PMC6704655; doi:10.1186/s12915-019-0688-7), 2019-08-22
Supplement: 12915_2019_688_MOESM1_ESM.pdf [file 12915_2019_688_MOESM1_ESM.pdf]

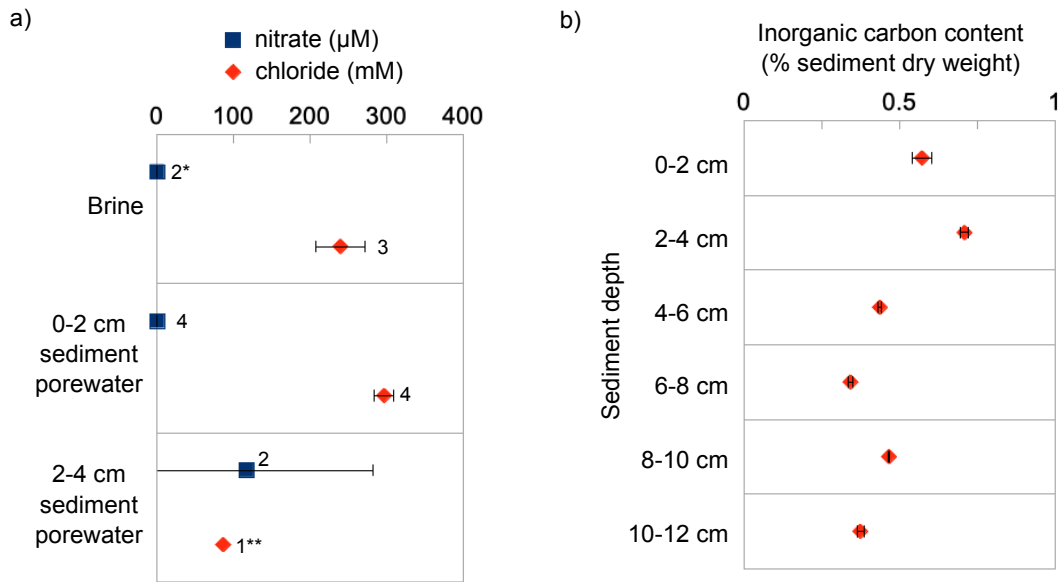

**Supplementary Figure 1. a) Nitrate and chloride ion concentrations measured in the brine and porewater samples.** Error bars show the standard deviation and the number of replicate measurements are given next to the data points. \* In one out of three samples a clear nitrate peak was observed, but the area was outside of the calibration range. \*\* For one out of two samples, the chloride peak failed. **b) Inorganic carbon content of dried sediment samples with depth.** For each depth, two replicate measurements were performed. Error bars show the standard deviation.
