# Supplementary material for: Metagenomes and metatranscriptomes shed new light on the microbial-mediated sulfur cycle in a Siberian soda lake
Source: PubMed Central journal article supplement (PMC6704655; doi:10.1186/s12915-019-0688-7), 2019-08-22
Supplement: 12915_2019_688_MOESM2_ESM.pdf [file 12915_2019_688_MOESM2_ESM.pdf]

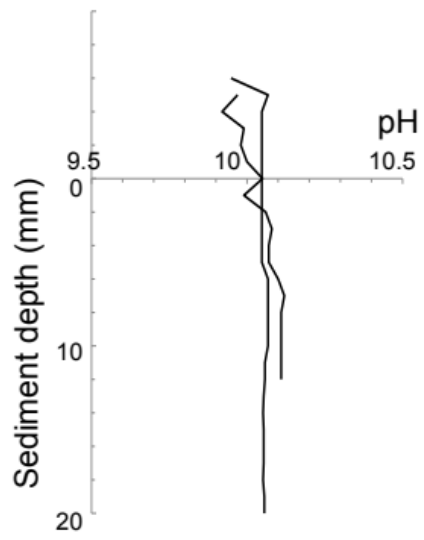

Figure S2 pH profile measured on two replicate sediment columns.
