# Supplementary material for: Metagenomes and metatranscriptomes shed new light on the microbial-mediated sulfur cycle in a Siberian soda lake
Source: PubMed Central journal article supplement (PMC6704655; doi:10.1186/s12915-019-0688-7), 2019-08-22
Supplement: 12915_2019_688_MOESM3_ESM.pdf [file 12915_2019_688_MOESM3_ESM.pdf]

**Table S1.** Grain size distribution of the top 12 cm sediment layer of Cock Soda Lake.

| <b>Classification</b> | <b>Proportion sample (%)</b> |
|-----------------------|------------------------------|
| Gravel                | 0.0                          |
| Sand                  | 79.7                         |
| Mud                   | 20.3                         |
| Coarse sand           | 2.2                          |
| Medium sand           | 29.9                         |
| Fine sand             | 9.4                          |
| Very fine sand        | 38.2                         |
| Very coarse silt      | 10.6                         |
| Coarse silt           | 3.1                          |
| Medium silt           | 2.4                          |
| Fine silt             | 1.4                          |
| Very fine silt        | 0.6                          |
| Clay                  | 2.2                          |

**Table S2.** Element composition of dry sediment determined by inductively coupled plasma mass spectrometry (ICP-MS).

| <b>Sediment layer</b> | <b>Fe (mg/kg)</b> | <b>Mn (mg/kg)</b> | <b>P (mg/kg)</b> |
|-----------------------|-------------------|-------------------|------------------|
| 0-2cm                 | 7014              | 187               | 198              |
| 2-4cm                 | 7462              | 154               | 162              |
| 4-6 cm                | 6393              | 124               | 134              |
| 6-8 cm                | 6781              | 121               | 125              |
| 8-10 cm               | 7850              | 170               | 128              |
| 10-12 cm              | 7840              | 167               | 141              |

**Table S3.** Metrics on the metagenomic raw sequence reads and assembled contigs obtained from Cock Soda Lake in 2016. The raw sequence reads were deposited to the NCBI Sequence Read Archive (SRA, Accession Number SRP144042).

| <b>Metagenome ID</b>                                      | <b>CS-Br16</b> | <b>CS-Sed16-2cmA</b> | <b>CS-Sed16-2cmB</b> | <b>CS-Sed16-5cm</b> |
|-----------------------------------------------------------|----------------|----------------------|----------------------|---------------------|
| <b>Sample type</b>                                        | brine          | Top 2cm sediment     | Top 2cm sediment     | Top 5cm sediment    |
| <b>Number of read pairs</b>                               | 321209669      | 320027988            | 314554411            | 333806161           |
| <b>Number of assembled contigs <math>\geq 1</math> kb</b> | 380600         | 1002855              | 1046590              | 998484              |
| <b>Average contig length (bp)</b>                         | 2412           | 2560                 | 2537                 | 2578                |
| <b>Maximum contig length (bp)</b>                         | 289008         | 267788               | 248036               | 338372              |
| <b>Total assembly length (bp)</b>                         | 917990274      | 2567058321           | 2654929585           | 2573987824          |
| <b>N50 (bp)</b>                                           | 2720           | 3018                 | 2966                 | 3048                |
| <b>Number of contigs <math>\geq 2.5</math> kb</b>         | 88700          | 263745               | 268963               | 259716              |
| <b>Number of contigs <math>\geq 5</math>kb</b>            | 28152          | 87605                | 88336                | 86835               |

**Table S4.** Metrics on the metatranscriptomic raw sequence reads and assembled transcripts obtained from the top 2cm sediment layer from Cock Soda Lake in 2016. The raw sequence reads were deposited to the NCBI Sequence Read Archive (SRA, Accession Number SRP144042).

| <b>Metatranscriptome ID</b>                                | <b>CS-Sed16-2cmA-RNA</b> |
|------------------------------------------------------------|--------------------------|
| <b>Number of read pairs</b>                                | 348450220                |
| <b>% of read pairs rRNA (SortMeRNA)</b>                    | 42 %                     |
| <b>% of read pairs used for assembly (non rRNA)</b>        | 58 %                     |
| <b>Number of assembled contigs <math>\geq 200</math> b</b> | 1056776                  |
| <b>Average contig length (bp)</b>                          | 719                      |
| <b>Maximum contig length (bp)</b>                          | 43306                    |
| <b>Total assembly length (bp)</b>                          | 760312569                |
| <b>N50 (bp)</b>                                            | 833                      |
