# Supplementary material for: Metagenomes and metatranscriptomes shed new light on the microbial-mediated sulfur cycle in a Siberian soda lake
Source: PubMed Central journal article supplement (PMC6704655; doi:10.1186/s12915-019-0688-7), 2019-08-22
Supplement: 12915_2019_688_MOESM8_ESM.pdf [file 12915_2019_688_MOESM8_ESM.pdf]

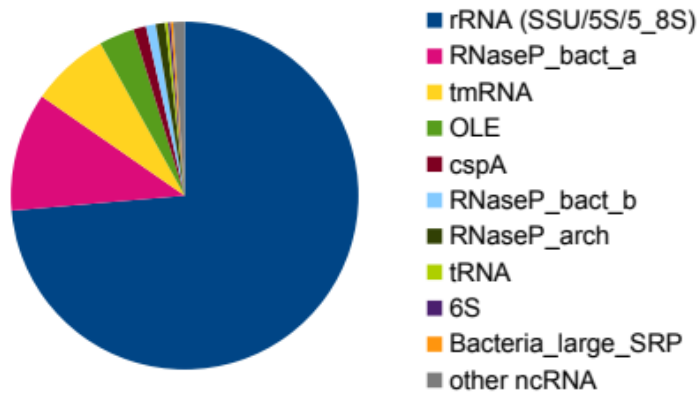

**Figure S4 Rfam family assignment of metatranscriptomic reads originating from non-coding RNA (ncRNA).** Only the percentage of reads (relative to the total of 136474149 reads assigned as ncRNA) for the top 10 abundant Rfam families is shown. OLE RNAs are widespread among thermophilic *Firmicutes*, including sulfidogens from the genera *Desulfotomaculum*, but their exact function remains unknown [99].
