# Supplementary material for: Metagenomes and metatranscriptomes shed new light on the microbial-mediated sulfur cycle in a Siberian soda lake
Source: PubMed Central journal article supplement (PMC6704655; doi:10.1186/s12915-019-0688-7), 2019-08-22
Supplement: 12915_2019_688_MOESM9_ESM.pdf [file 12915_2019_688_MOESM9_ESM.pdf]

a) All pathway modules

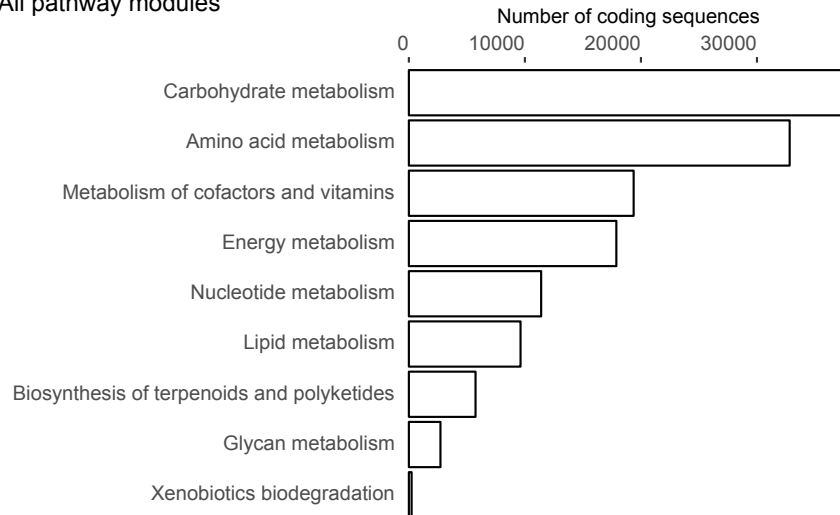

b) Energy metabolism modules

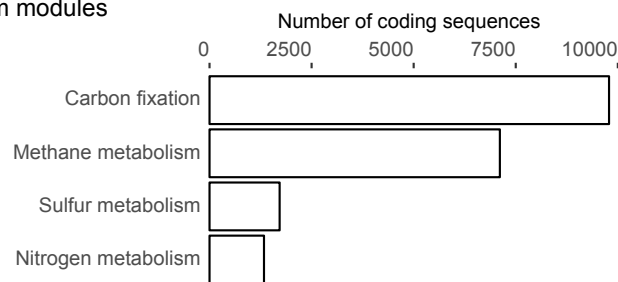

c) Nitrogen and sulfur metabolism

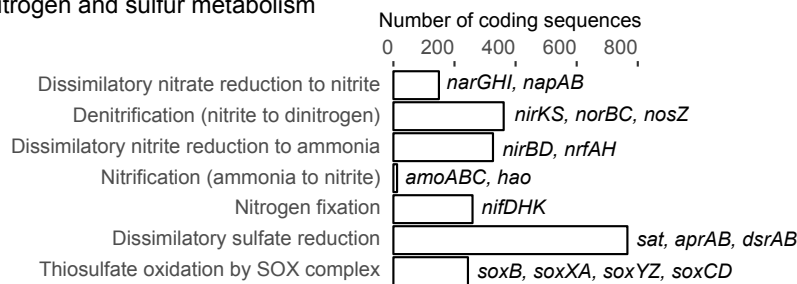

**Supplementary Figure 5. Functional classification of the KEGG-annotated transcripts.**

In total 582,671 K numbers were assigned to 1,419,467 coding sequences (cds) on the metatranscriptomic contigs. a) Classification of annotated cds to the pathway modules within KEGG mapper. b) Sub-classification of annotated cds within “Energy metabolism”. c) Coding sequences annotated as transcripts of selected marker genes in pathways within the “Nitrogen metabolism” and “Sulfur metabolism”.
