# Supplementary material for: Metagenomes and metatranscriptomes shed new light on the microbial-mediated sulfur cycle in a Siberian soda lake
Source: PubMed Central journal article supplement (PMC6704655; doi:10.1186/s12915-019-0688-7), 2019-08-22
Supplement: 12915_2019_688_MOESM11_ESM.pdf [file 12915_2019_688_MOESM11_ESM.pdf]

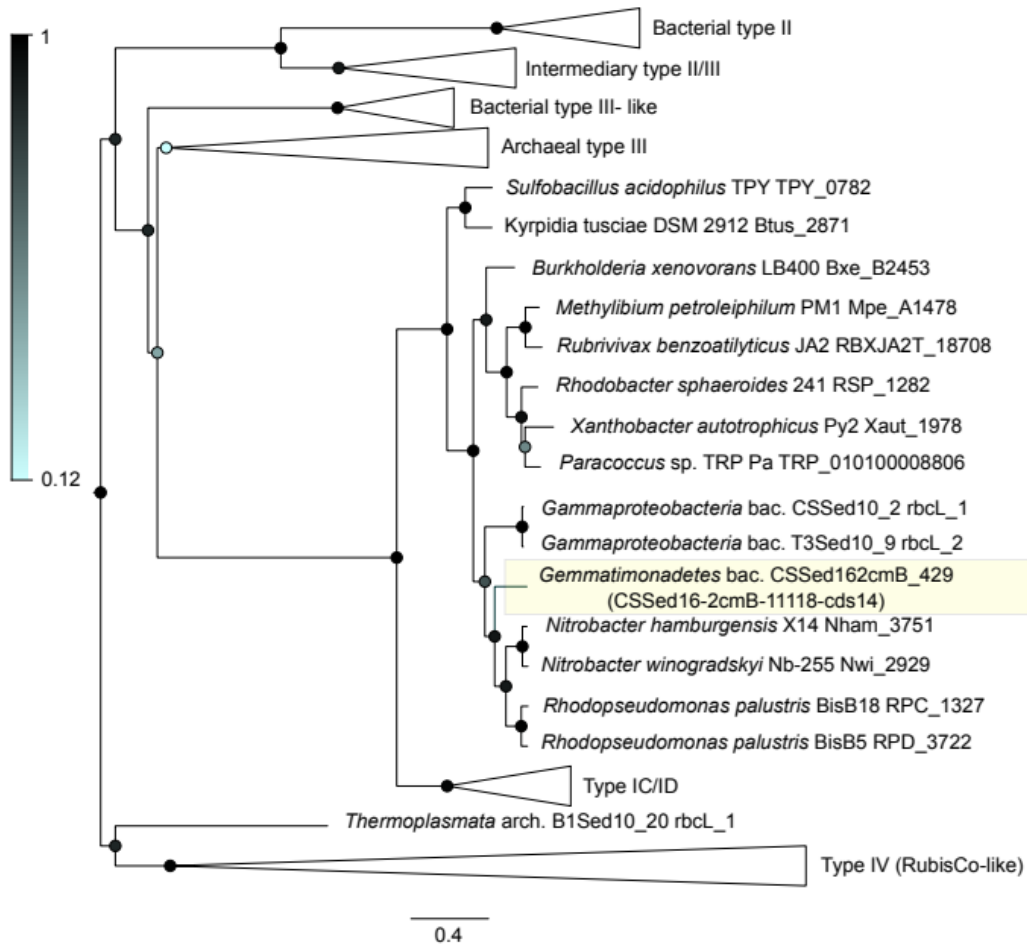

**Supplementary Figure 6. Maximum likelihood tree showing the phylogeny of the large subunit of RubisCo found in the MAG of the putative photoautotrophic *Gemmatimonadetes* bacterium.** References were obtained from [35]. All types except for type IA/IB are collapsed and the branch of the *Gemmatimonadetes* MAG is highlighted. Colored circles at the nodes represent the bootstraps values and the scale bare indicates the amino acid substitutions per site.
